# Supplementary material for: A rapid dehydration leaf assay reveals stomatal response differences in grapevine genotypes
Source: PubMed Central journal article supplement — Hortic Res. 2014 Jan 22;1:2–. doi: 10.1038/hortres.2014.2 (PMC4591676; doi:10.1038/hortres.2014.2), 2014-01-22
Supplement: hortres20142-s7.pdf [file hortres20142-s7.pdf]

Supplemental Table 1: Coefficient-of-variation (CV) comparing different measurements for determining water loss after 150 min. of treatment, n = 9

|                                                                       | Ramsey | Ripaia Gloire | Cabernet Sauvignon | Grenache  | Shiraz    | Average |
|-----------------------------------------------------------------------|--------|---------------|--------------------|-----------|-----------|---------|
| Water loss normalized by leaf length                                  |        |               |                    |           |           |         |
| CV                                                                    | 36.97% | 24.64%        | 20.50%             | 34.74%    | 12.58%    | 25.89%  |
| Water loss normalized by leaf area                                    |        |               |                    |           |           |         |
| CV                                                                    | 34.80% | 29.93%        | 40.53%             | <b>ND</b> | <b>ND</b> | 35.09%  |
| Water loss on a per leaf basis (Figure 5A)                            |        |               |                    |           |           |         |
| CV                                                                    | 66.79% | 66.86%        | 64.54%             | 86.06%    | 56.09%    | 68.07%  |
| Water loss normalized by fresh weight (Figure 5B)                     |        |               |                    |           |           |         |
| CV                                                                    | 22.35% | 19.53%        | 20.85%             | 26.81%    | 14.05%    | 20.72%  |
| Rate of water loss (Figure 5C)                                        |        |               |                    |           |           |         |
| CV                                                                    | 36.66% | 61.81%        | 90.03%             | 66.61%    | 74.02%    | 65.83%  |
| Stomatal conductance after application of 500 $\mu$ M ABA (Figure 7B) |        |               |                    |           |           |         |
| CV                                                                    | 49.46% | 44.59%        | 31.88%             | 46.03%    | 45.87%    | 43.57%  |
